# Supplementary material for: A Metabolic Insight Into the Neuroprotective Effect of Jin-Mai-Tong (JMT) Decoction on Diabetic Rats With Peripheral Neuropathy Using Untargeted Metabolomics Strategy
Source: PubMed Central journal article supplement (PMC7066215; doi:10.3389/fphar.2020.00221), 2020-03-05
Supplement: Data_Sheet_1.pdf [file Data_Sheet_1.pdf]

## Supplementary Material

### **A Metabolic Insight Into the Neuroprotective Effect of Jin-Mai-Tong (JMT) Decoction on Diabetic Rats With Peripheral Neuropathy Using Untargeted Metabolomics Strategy**

**Qian Zhang<sup>1†</sup>, Wei Song<sup>2†</sup>, Xiaochun Liang<sup>1\*</sup>, Jun Xie<sup>1</sup>, Yue Shi<sup>1</sup>, Xiaohu Shi<sup>1</sup>, Bintaο Qiu<sup>2</sup>, Xiuting Chen<sup>2</sup>**

<sup>1</sup>Department of Traditional Chinese Medicine, Peking Union Medical College Hospital, Peking Union Medical College, Chinese Academy of Medical Science, Beijing, China

<sup>2</sup>Medical Research Center, Peking Union Medical College Hospital, Peking Union Medical College, Chinese Academy of Medical Science, Beijing, China

\* **Correspondence:** Xiaochun Liang, Xiaochun\_Liang@yeah.net

† These authors have contributed equally to this work

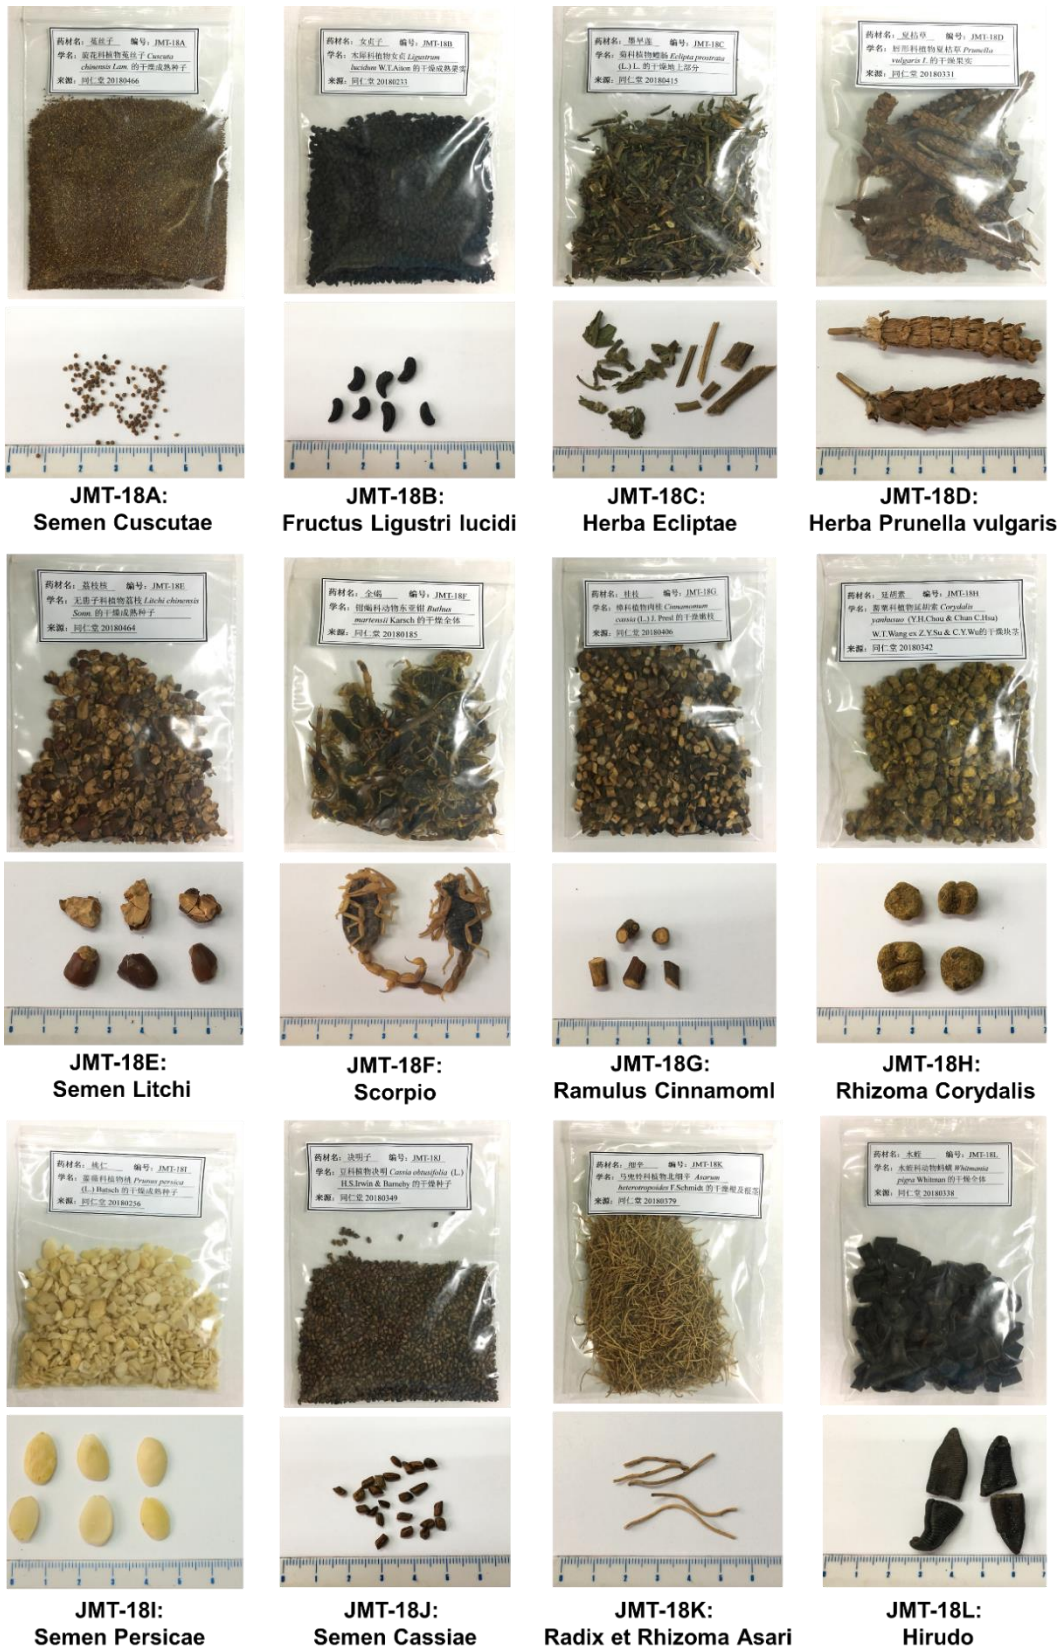

**SUPPLEMENTARY FIGURE 1 | Scan of the vouchers for 12 kinds of crude drugs in Jin-Mai-Tong decoction (JMT). Botanic samples, JMT-A—JMT-E and JMT-G—JMT-K; animal samples, JMT-F and JMT-L.**

(A)

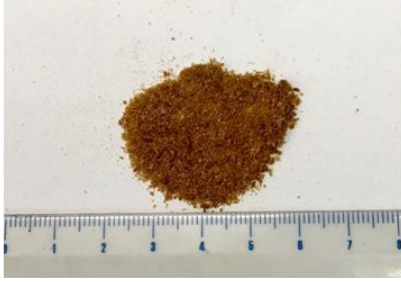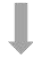

Chemical analysis by UHPLC/Triple-TOF MS

(B)

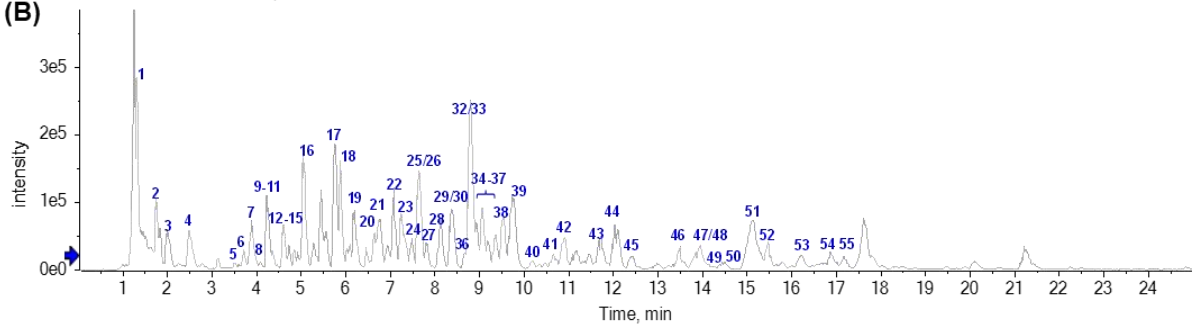

**SUPPLEMENTARY FIGURE 2 | The freeze-dried powder of Jin-Mai-Tong decoction (JMT) (A) and the base peak chromatogram of JMT in ESI (-) ion mode (B).**

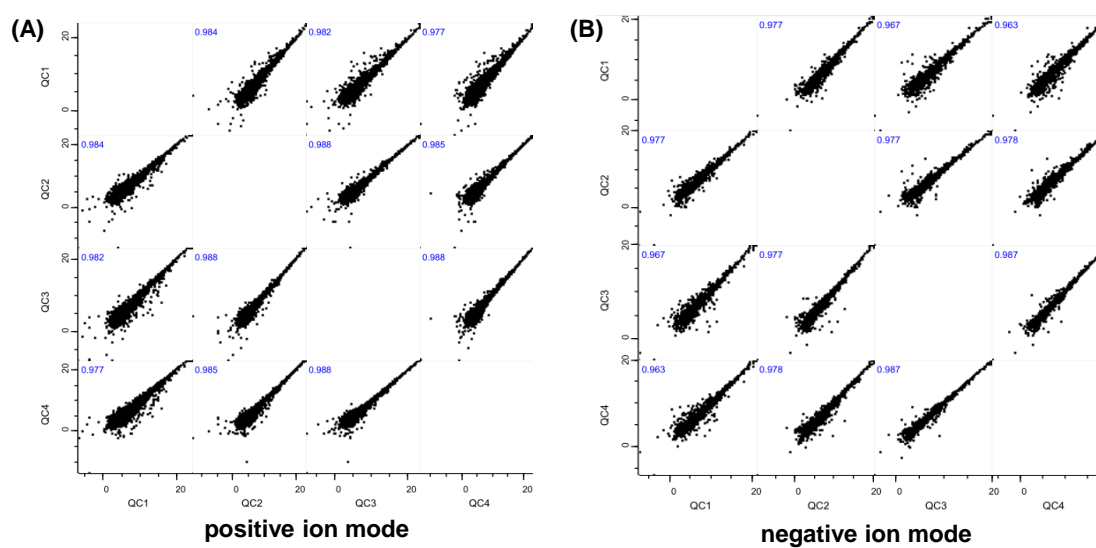

**SUPPLEMENTARY FIGURE 3 | Correlation analysis of the QC samples in positive (A) and negative (B) ion modes. The values of  $r^2$  were exhibited in blue font.**

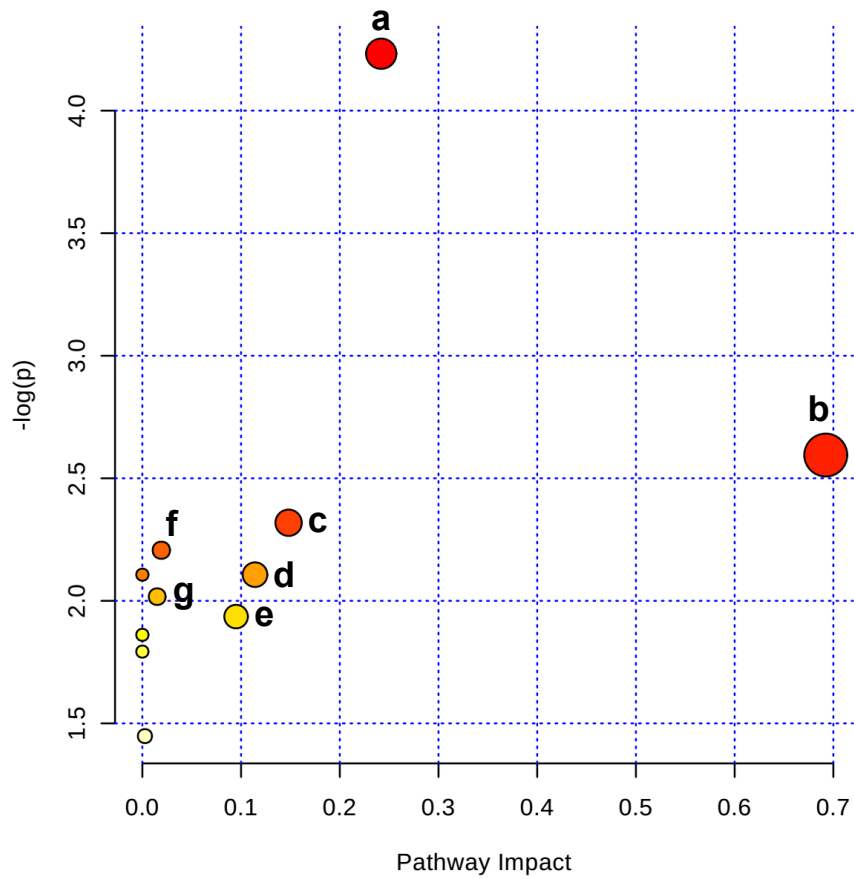

**SUPPLEMENTARY FIGURE 4 | Bubble map from pathway Analysis.** (a, glycerophospholipid metabolism; b, caffeine metabolism; c, glyoxylate and dicarboxylate metabolism; d, citrate cycle (TCA cycle); e, alanine, aspartate and glutamate metabolism; f, glycerolipid metabolism; g, pyruvate metabolism.

**SUPPLEMENTARY TABLE 1 | Detailed information of the crude drug materials of Jin-Mai-Tong decoction (JMT) used in this study.**

| Voucher number | Drug name               | Biological origins                                                                           | Chinese name | Batch number |
|----------------|-------------------------|----------------------------------------------------------------------------------------------|--------------|--------------|
| JMT-18A        | Semen Cuscutae          | the seeds of <i>Cuscuta chinensis</i> Lam.                                                   | Tu-Si-Zi     | 20180466     |
| JMT-18B        | Fructus Ligustri lucidi | the seeds of <i>Ligustrum lucidum</i> W.T.Aiton                                              | Nv-Zhen-Zi   | 20180233     |
| JMT-18C        | Herba Ecliptae          | the herb of <i>Eclipta prostrata</i> (L.) L.                                                 | Mo-Han-Lian  | 20180451     |
| JMT-18D        | Herba Prunella Vulgaris | the herb of <i>Prunella vulgaris</i> L.                                                      | Xia-Ku-Cao   | 20180331     |
| JMT-18E        | Semen Litchi            | the seeds of <i>Litchi chinensis</i> Sonn.                                                   | Li-Zhi-He    | 20180464     |
| JMT-18F        | Scorpio                 | the whole body of <i>Buthus martensii</i> Karsch                                             | Quan-Xie     | 20180185     |
| JMT-18G        | Ramulus Cinnamomi       | the tender stem of <i>Cinnamomum cassia</i> (L.) J. Presl                                    | Gui-Zhi      | 20180406     |
| JMT-18H        | Rhizoma Corydalis       | the rhizoma of <i>Corydalis yanhusuo</i> (Y.H.Chou & Chun C.Hsu) W.T.Wang ex Z.Y.Su & C.Y.Wu | Yan-Hu-Suo   | 20180342     |
| JMT-18I        | Semen Persicae          | the seeds of <i>Prunus persica</i> (L.) Batsch                                               | Tao-Ren      | 20180256     |
| JMT-18J        | Senmen Cassiae          | the seeds of <i>Cassia obtusifolia</i> L.                                                    | Jue-Ming-Zi  | 20180349     |
| JMT-18K        | Radix et Rhizoma Asari  | the radix and rhizoma of <i>Asarum heterotropoides</i> F.Schmidt                             | Xi-Xin       | 20180379     |
| JMT-18L        | Hirudo                  | the whole body of <i>Whitmania pigra</i> Whitman.                                            | Shui-Zhi     | 20180338     |

**SUPPLEMENTARY TABLE 2 | Compounds putatively identified from Jin-Mai-Tong decoction (JMT) by HPLC/Triple-TOF MS analysis**

| Peak No. | $t_R$ (min) | Measured [M-H] <sup>-</sup> (m/z) | Predicted [M-H] <sup>-</sup> (m/z) | $\Delta$ (ppm) | Formula                                         | (-) MS/MS (m/z)    | Identification                           | Derived From |
|----------|-------------|-----------------------------------|------------------------------------|----------------|-------------------------------------------------|--------------------|------------------------------------------|--------------|
| 1        | 1.31        | 515.1158                          | 515.1190                           | -6.21          | C <sub>25</sub> H <sub>24</sub> O <sub>12</sub> | 353.1019, 191.0058 | isochlorogenic acid C                    | C            |
| 2        | 1.75        | 167.0350                          | 167.0342                           | 4.79           | C <sub>8</sub> H <sub>8</sub> O <sub>4</sub>    | 135.0816, 133.0785 | vanillic acid                            | D            |
| 3        | 2.15        | 153.0192                          | 153.0188                           | 2.61           | C <sub>7</sub> H <sub>6</sub> O <sub>4</sub>    | 109.0279           | protocaechuic acid                       | E            |
| 4        | 2.50        | 353.1013                          | 353.1025                           | -3.40          | C <sub>20</sub> H <sub>18</sub> O <sub>6</sub>  | 339.0871,          | asarinin                                 | J            |
| 5        | 3.51        | 633.4045                          | 633.4003                           | 6.63           | C <sub>36</sub> H <sub>58</sub> O <sub>9</sub>  | 471.3483, 453.3337 | ecliptasaponin A or D                    | C            |
| 6        | 3.72        | 633.4055                          | 633.4003                           | 8.21           | C <sub>36</sub> H <sub>58</sub> O <sub>9</sub>  | 471.3481, 453.3340 | ecliptasaponin A or D                    | C            |
| 7        | 3.93        | 289.0739                          | 289.0712                           | 9.34           | C <sub>15</sub> H <sub>14</sub> O <sub>6</sub>  | 245.0812, 205.0503 | epicatichin                              | E            |
| 8        | 4.12        | 919.2774                          | 919.2719                           | 5.98           | C <sub>39</sub> H <sub>52</sub> O <sub>25</sub> | 919.2722, 271.0615 | cassiaside B2                            | I            |
| 9        | 4.31        | 685.2331                          | 685.2344                           | -1.90          | C <sub>31</sub> H <sub>42</sub> O <sub>17</sub> | 453.3316           | specnuezhenide                           | B            |
| 10       | 4.43        | 313.0359                          | 313.0348                           | 3.51           | C <sub>16</sub> H <sub>10</sub> O <sub>7</sub>  | 297.1523           | wedelolactone                            | C            |
| 11       | 4.50        | 609.1860                          | 609.1819                           | 6.73           | C <sub>28</sub> H <sub>34</sub> O <sub>15</sub> | 447.1278, 285.0761 | hesperidin                               | E            |
| 12       | 4.71        | 353.0871                          | 353.0873                           | -0.57          | C <sub>16</sub> H <sub>18</sub> O <sub>9</sub>  | 191.0561           | chlorogenic acid                         | A,C          |
| 13       | 4.79        | 957.5067                          | 957.5059                           | 0.84           | C <sub>48</sub> H <sub>78</sub> O <sub>19</sub> | 795.4531, 455.3455 | ecliptasaponin B or III                  | C            |
| 14       | 4.92        | 563.1431                          | 563.1401                           | 5.33           | C <sub>26</sub> H <sub>28</sub> O <sub>14</sub> | 473.1090, 383.0771 | schaftoside                              | E            |
| 15       | 4.96        | 340.1540                          | 340.1549                           | -2.65          | C <sub>20</sub> H <sub>23</sub> NO <sub>4</sub> | 178.056            | tetrahydrojatrorrhizine                  | G            |
| 16       | 5.05        | 595.1705                          | 595.1663                           | 7.06           | C <sub>27</sub> H <sub>32</sub> O <sub>15</sub> | 271.0633, 255.0393 | rubrofusarin-6-o- $\beta$ -gentiobioside | I            |
| 17       | 5.75        | 463.0896                          | 463.0877                           | 4.10           | C <sub>21</sub> H <sub>20</sub> O <sub>12</sub> | 303.0428           | hyperoside                               | A            |
| 18       | 5.88        | 419.1019                          | 419.0978                           | 9.78           | C <sub>20</sub> H <sub>20</sub> O <sub>10</sub> | 257.0479           | cassiaside                               | I            |
| 19       | 6.26        | 463.0901                          | 463.0877                           | 5.18           | C <sub>21</sub> H <sub>20</sub> O <sub>12</sub> | 301.0344           | isoquercitrin                            | A,C,D        |
| 20       | 6.68        | 253.0513                          | 253.0501                           | 4.74           | C <sub>15</sub> H <sub>10</sub> O <sub>4</sub>  | 225.0105           | chrysophanol                             | C            |
| 21       | 6.85        | 491.1231                          | 491.1190                           | 8.35           | C <sub>23</sub> H <sub>24</sub> O <sub>12</sub> | 329.0598           | hesperidin-6-o- $\beta$ -D-glucoside     | I            |
| 22       | 7.05        | 447.0897                          | 447.0927                           | -6.71          | C <sub>21</sub> H <sub>20</sub> O <sub>11</sub> | 285.0425, 133.0292 | luteoline 7Oglucoside                    | A,D          |

|    |       |           |           |       |                                                 |                     |                                     |       |
|----|-------|-----------|-----------|-------|-------------------------------------------------|---------------------|-------------------------------------|-------|
| 23 | 7.33  | 465.1032  | 465.1033  | -0.22 | C <sub>21</sub> H <sub>22</sub> O <sub>12</sub> | 285.0453            | dihydroquercetin                    | B     |
| 24 | 7.51  | 795.4469  | 795.4531  | -7.79 | C <sub>42</sub> H <sub>68</sub> O <sub>14</sub> | 453.3356            | ecliptasaponin I,C,IV or XV         | C     |
| 25 | 7.63  | 447.0950  | 447.0927  | 5.14  | C <sub>21</sub> H <sub>20</sub> O <sub>11</sub> | 285.0402, 151.0030  | luteoloside                         | I     |
| 26 | 7.69  | 445.0751  | 445.0771  | -4.49 | C <sub>21</sub> H <sub>18</sub> O <sub>11</sub> | 269.0453            | apigenin-7-O-glucronide             | J     |
| 27 | 7.85  | 447.0939  | 447.0927  | 2.68  | C <sub>21</sub> H <sub>20</sub> O <sub>11</sub> | 285.0395            | astragalin                          | A     |
| 28 | 8.20  | 685.2359  | 685.2344  | 2.19  | C <sub>31</sub> H <sub>42</sub> O <sub>17</sub> | 453.3308            | nuezhenoside                        | B     |
| 29 | 8.41  | 785.2501  | 785.2504  | -0.38 | C <sub>35</sub> H <sub>46</sub> O <sub>20</sub> | 623.1962, 477.1308  | echinacoside                        | B     |
| 30 | 8.50  | 843.4395  | 843.4378  | 2.02  | C <sub>42</sub> H <sub>68</sub> O <sub>17</sub> | 633.3495, 471.3387  | ecliptasaponin VI                   | C     |
| 31 | 8.69  | 359.0777  | 359.0767  | 2.78  | C <sub>18</sub> H <sub>16</sub> O <sub>8</sub>  | 322.0093            | rosmarinic acid                     | D     |
| 32 | 8.80  | 299.1157  | 299.1131  | 8.69  | C <sub>14</sub> H <sub>20</sub> O <sub>7</sub>  | 137.0591            | salidroside                         | B     |
| 33 | 8.95  | 1071.3583 | 1071.3557 | 2.43  | C <sub>48</sub> H <sub>64</sub> O <sub>27</sub> | 1117.2850, 909.2386 | oleonuezhenide                      | B     |
| 34 | 9.05  | 453.3329  | 453.3369  | -8.82 | C <sub>30</sub> H <sub>46</sub> O <sub>3</sub>  | 437.3395            | 3-hydroxy oleanolic acid            | C     |
| 35 | 9.21  | 301.0352  | 301.0348  | 1.33  | C <sub>15</sub> H <sub>10</sub> O <sub>7</sub>  | 165.9889            | quercetin                           | A,C,D |
| 36 | 9.35  | 505.1325  | 505.1346  | -4.16 | C <sub>24</sub> H <sub>26</sub> O <sub>12</sub> | 343.0828            | cassiin                             | I     |
| 37 | 9.43  | 449.1102  | 449.1084  | 4.01  | C <sub>21</sub> H <sub>22</sub> O <sub>11</sub> | 287.0543            | eriodictyol-7-o-glucoside           | J     |
| 38 | 9.60  | 451.1096  | 451.1088  | 1.77  | C <sub>17</sub> H <sub>24</sub> O <sub>14</sub> | 407.2266            | privet acid                         | B     |
| 39 | 9.74  | 368.1875  | 368.1862  | 3.53  | C <sub>22</sub> H <sub>27</sub> NO <sub>4</sub> | 336.1039, 294.0850  | corydaline                          | G     |
| 40 | 10.19 | 279.2311  | 279.2324  | -4.66 | C <sub>18</sub> H <sub>32</sub> O <sub>2</sub>  | 279.2308            | linoleic acid                       | H     |
| 41 | 10.69 | 283.0629  | 283.0607  | 7.77  | C <sub>16</sub> H <sub>12</sub> O <sub>5</sub>  | 268.0367            | obtusifolin                         | I     |
| 42 | 10.95 | 285.0385  | 285.0399  | -4.91 | C <sub>15</sub> H <sub>10</sub> O <sub>6</sub>  | 175.0387, 151.0006  | kaempferol                          | A     |
| 43 | 11.81 | 431.1014  | 431.1009  | 1.16  | C <sub>21</sub> H <sub>19</sub> O <sub>10</sub> | 269.0453            | emodin-6-o-β-D-glucoside            | I     |
| 44 | 12.05 | 343.0829  | 343.0818  | 3.21  | C <sub>18</sub> H <sub>16</sub> O <sub>7</sub>  | 285.0364            | obtusin                             | I     |
| 45 | 12.47 | 357.1003  | 357.0975  | 7.84  | C <sub>19</sub> H <sub>18</sub> O <sub>7</sub>  | 313.0272, 269.0104  | methyl Obtusin                      | I     |
| 46 | 13.50 | 329.0677  | 329.0661  | 4.86  | C <sub>17</sub> H <sub>14</sub> O <sub>7</sub>  | 270.0162            | aurantio-obtusin                    | I     |
| 47 | 13.83 | 461.0710  | 461.0720  | -2.17 | C <sub>21</sub> H <sub>18</sub> O <sub>12</sub> | 285.0407,           | scutellarin                         | J     |
| 48 | 14.00 | 519.1523  | 519.1503  | 3.85  | C <sub>25</sub> H <sub>28</sub> O <sub>12</sub> | 227.1259            | 6'-O-cinnamoyl-8-epikingisidic acid | B     |



|    |       |           |          |       |                                                 |                    |                            |     |
|----|-------|-----------|----------|-------|-------------------------------------------------|--------------------|----------------------------|-----|
| 49 | 14.40 | 149.0605  | 149.0597 | 5.37  | C <sub>9</sub> H <sub>8</sub> O <sub>2</sub>    | 131.0486           | cinnamic acid              | F   |
| 50 | 14.55 | 461.0758  | 461.0720 | 8.24  | C <sub>21</sub> H <sub>18</sub> O <sub>12</sub> | 279.0410, 285.0038 | kaempferol-3-O-glucuronide | A   |
| 51 | 15.29 | 285.0413  | 285.0399 | 4.91  | C <sub>15</sub> H <sub>10</sub> O <sub>6</sub>  | 151.0041, 133.0256 | luteolin                   | A,C |
| 52 | 15.50 | 269.04561 | 269.0450 | 2.27  | C <sub>15</sub> H <sub>10</sub> O <sub>5</sub>  | 151.0033           | apigenin                   | A   |
| 53 | 16.18 | 539.1820  | 539.1765 | 10.20 | C <sub>25</sub> H <sub>32</sub> O <sub>13</sub> | 275.0839           | oleuropein                 | B   |
| 54 | 16.90 | 287.0562  | 287.0556 | 2.09  | C <sub>15</sub> H <sub>12</sub> O <sub>6</sub>  | 151.0038           | eriodictyol                | J   |
| 55 | 17.17 | 255.2347  | 255.2324 | 9.01  | C <sub>16</sub> H <sub>32</sub> O <sub>2</sub>  | 255.2337           | hexadecanoic acid          | H   |

*Note:* A, Semen Cuscutae; B, glossy privet fruit; C, Eclipta prostrata; D, Prunella vulgaris; E, semen litchi; F, cassia twig; G, Corydalis Rhizoma; H, Persicae semen; I, Cassiae Semen; J, Asarum L.

**SUPPLEMENTARY TABLE S3 | The precision of peak area for ten selected ions in positive and negative ion modes**

| ion mode | extracted ion ( $t_R$ _m/z) | QC-1   | QC-2   | QC-3   | QC-4   | RSD (%)      |
|----------|-----------------------------|--------|--------|--------|--------|--------------|
| positive | 0.73_407.9660               | 681    | 620    | 618    | 653    | <b>4.67</b>  |
|          | 4.16_503.2578               | 102040 | 106455 | 110882 | 116411 | <b>5.64</b>  |
|          | 8.54_255.2217               | 4508   | 4278   | 4406   | 4519   | <b>2.53</b>  |
|          | 12.11_889.9594              | 6308   | 6624   | 6813   | 6712   | <b>3.30</b>  |
|          | 16.20_743.5491              | 129487 | 122789 | 128084 | 109392 | <b>7.48</b>  |
| negative | 0.55_143.0938               | 1617   | 1566   | 1461   | 1341   | <b>8.17</b>  |
|          | 4.76_671.2985               | 4056   | 3610   | 3338   | 3254   | <b>10.13</b> |
|          | 8.53_301.2971               | 9040   | 8028   | 7357   | 7028   | <b>11.29</b> |
|          | 12.75_629.8071              | 12546  | 11617  | 10731  | 10174  | <b>9.22</b>  |
|          | 16.89_955.4596              | 28305  | 22554  | 26636  | 28888  | <b>10.75</b> |
